# Supplementary material
Source: publisher site journal article supplement (https://www.dovepress.com/article/481368)
Supplement: Supplementary file 1 [file get_supplementary_file.php]

Supporting Information

Table S1 The particle size and PDI of Nanogels at different ratios.

| γ-PGA-SH:PEI-SH | SIZE(nm) | PDI | Intensity |
| --- | --- | --- | --- |
| 1：1 | 1064.5 | 0.365 | ----- |
| 1.25：1 | 1368.9 | 0.105 | ----- |
| 1.5：1 | 326.8 | 0.031 | 300 |
| 1.75：1 | 149.8 | 0.108 | 300 |
| 2：1 | 163.5 | 0.109 | 300 |
| 2.25：1 | 144.8 | 0.279 | 300 |
| 2.5：1 | 164.8 | 0.533 | 90 |
| 2.75：1 | 635.1 | 0.587 | 50 |
| 3：1 | 1382.2 | 0.348 | ----- |


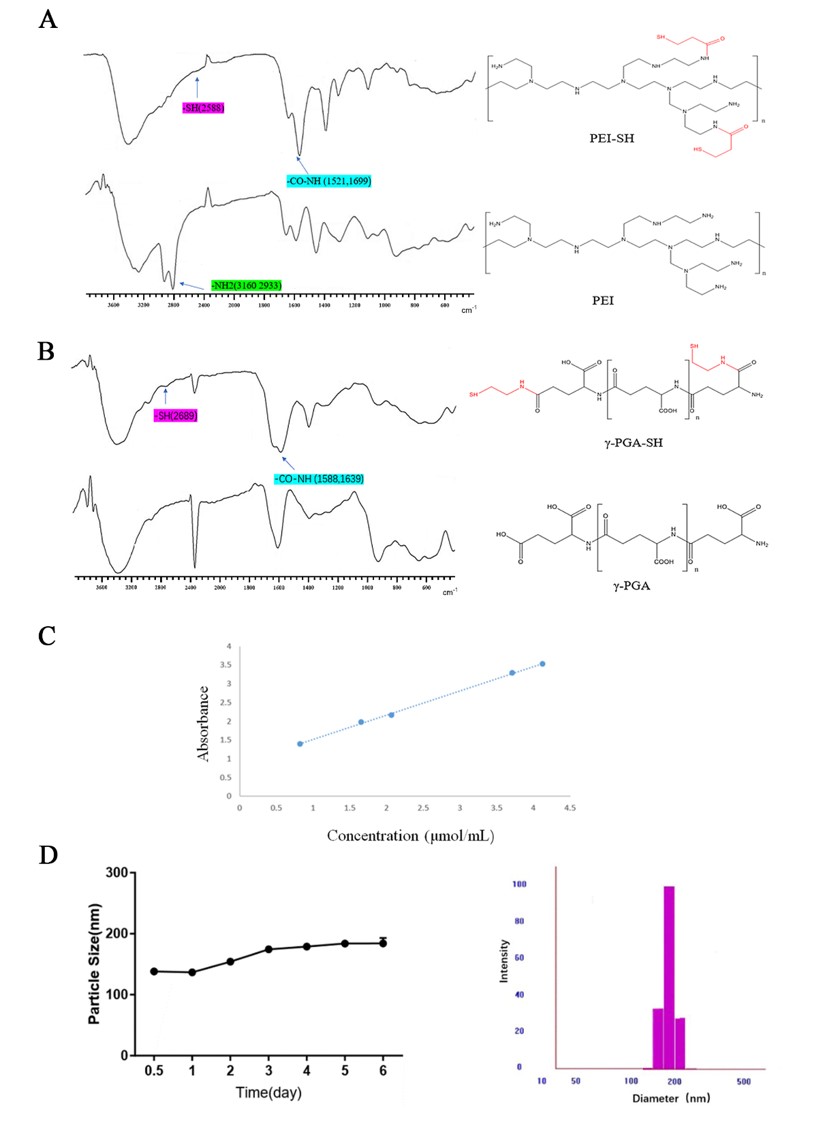


Figure S1(A) IR spectrum of PEI and PEI-SH. (B) IR spectrum of γ-PGA and γ-PGA-SH. (C) Standard curve of thiol content detected by Ellman’s examination. (D) Particle size and PDI stability of nanogel within 7d at room temperature.


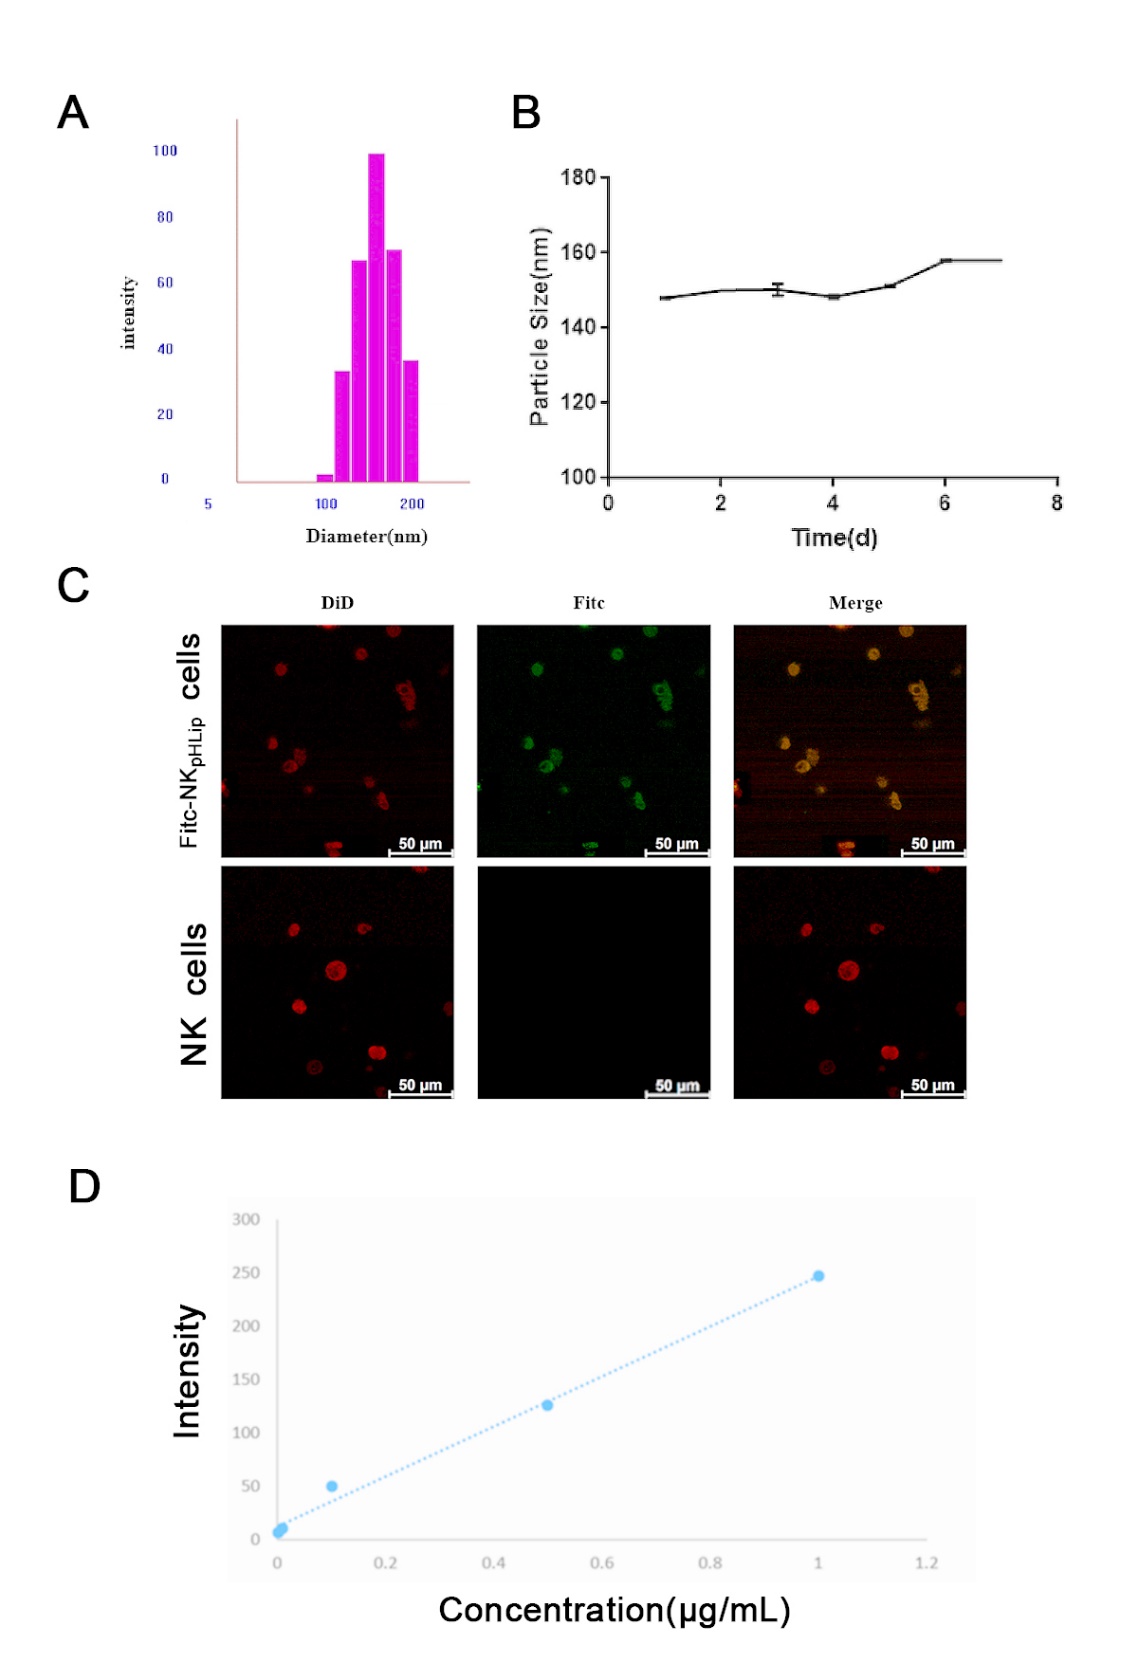


Figure S2 (A) Particle size distribution diagram of the pHLip-MFL. (B) Stability test of the pHLip-MFL in 7days. (C) Laser scanning confocal fluorescence microscopy (LSCM) images of FITC-NKpHLip and unmodified pHLip NK cells (red: DiD labeled cell membrane, green: FITC fluorescence). (D) FITC standard curve, which used to get the amount of the pHLip peptide attached to the NK cell membrane.
